# Supplementary material for: ECM proteins in a microporous scaffold influence hepatocyte morphology, function, and gene expression
Source: PubMed Central journal article supplement (PMC5126637; doi:10.1038/srep37427), 2016-11-29

Supplementary Information

**ECM proteins in a microporous scaffold influence hepatocyte morphology, function, and gene expression**

Yan Wang<sup>1,2,±</sup>, Myung Hee Kim<sup>1,2,±</sup>, Hitomi Shirahama<sup>1,2</sup>, Jae Ho Lee<sup>1,2</sup>, Soon Seng Ng<sup>1,2</sup>,  
Jeffrey S. Glenn<sup>3,4</sup> & Nam-Joon Cho<sup>1,2,5,\*</sup>

<sup>1</sup>School of Materials Science and Engineering, Nanyang Technological University, 50 Nanyang Avenue 639798, Singapore

<sup>2</sup>Centre for Biomimetic Sensor Science, Nanyang Technological University, 50 Nanyang Drive 637553, Singapore

<sup>3</sup>Division of Gastroenterology and Hepatology, Department of Medicine, Stanford University School of Medicine, Palo Alto, California, United States of America

<sup>4</sup>Department of Microbiology and Immunology, Stanford University School of Medicine, Palo Alto, California, United States of America

<sup>5</sup>School of Chemical and Biomedical Engineering, Nanyang Technological University, 62 Nanyang Avenue 637459, Singapore

<sup>±</sup>These authors contributed equally to this work.

\*Correspondence and requests for materials should be addressed to N.J.C. (email:

njcho@ntu.edu.sg)

**Supplementary Figure 1.** High quality figures of the day 14 merged images of Huh-7.5 cells with immunofluorescence staining for CYP3A4 (green) and co-stained for F-actin (red) and nuclei (blue).

**Supplementary Figure 2.** High quality figures of the day 14 merged images of Huh-7.5 cells with immunofluorescence staining for E-cadherin (green) and co-stained for F-actin (red) and nuclei (blue).

Supplementary Figure 1

Bare ICC

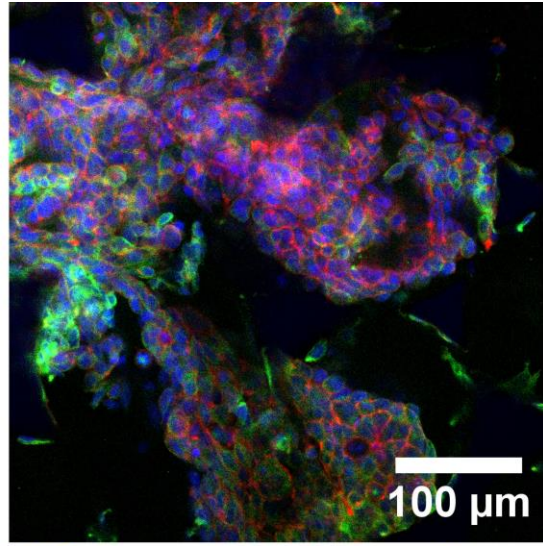

Collagen ICC

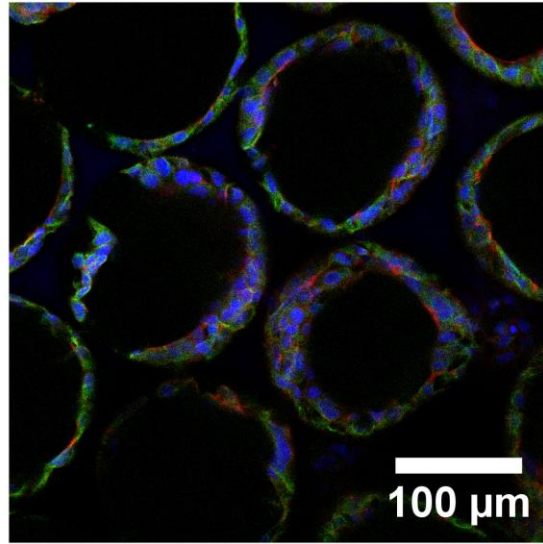

Fibronectin ICC

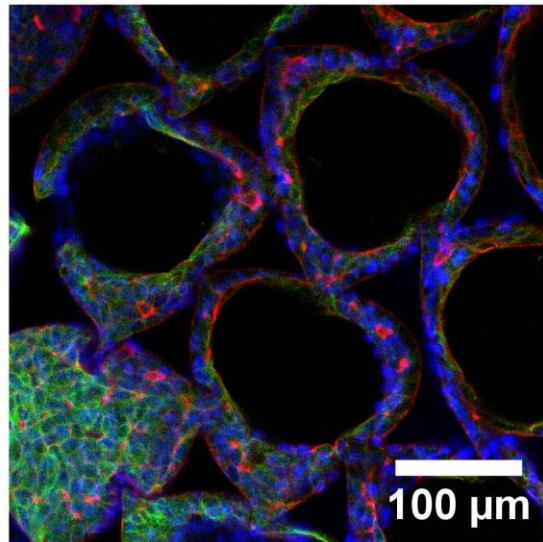

Supplementary Figure 2

Bare ICC

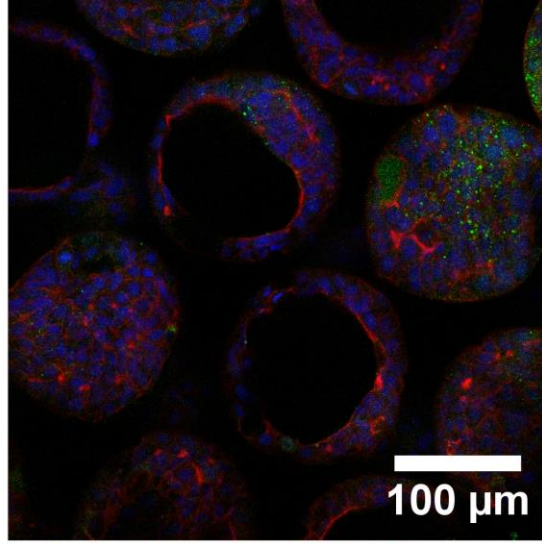

Collagen ICC

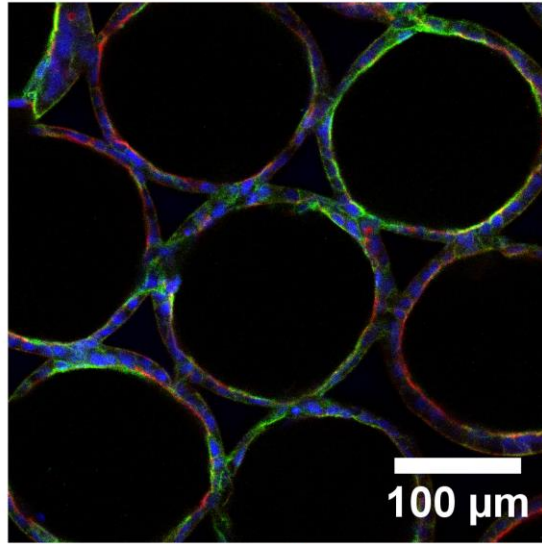

Fibronectin ICC

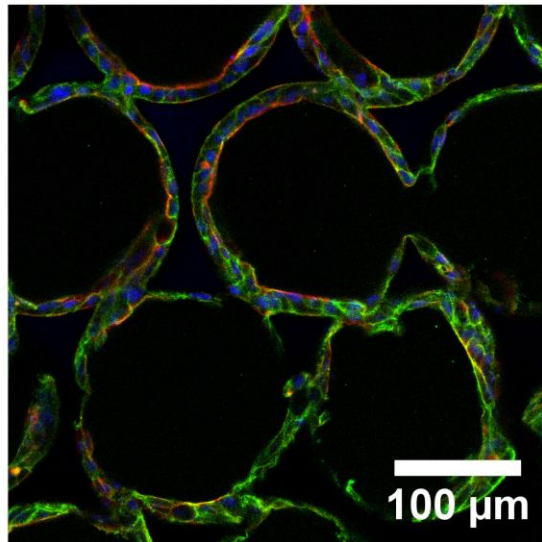

Supplement: srep37427-s1.pdf [file srep37427-s1.pdf]
